# Supplementary material for: The Response Surface Optimization of Supercritical CO2 Modified with Ethanol Extraction of p-Anisic Acid from Acacia mearnsii Flowers and Mathematical Modeling of the Mass Transfer
Source: MDPI journal article supplement (doi:10.3390/molecules27030970), 2022-01-31
Supplement: s1 [file s1]

## Support information

Figures S1-S7 below exhibit the chromatograms of the 7 crude extracts obtained with factorial design. Extraction conditions for each extract are shown in parentheses in the respective figure legend.

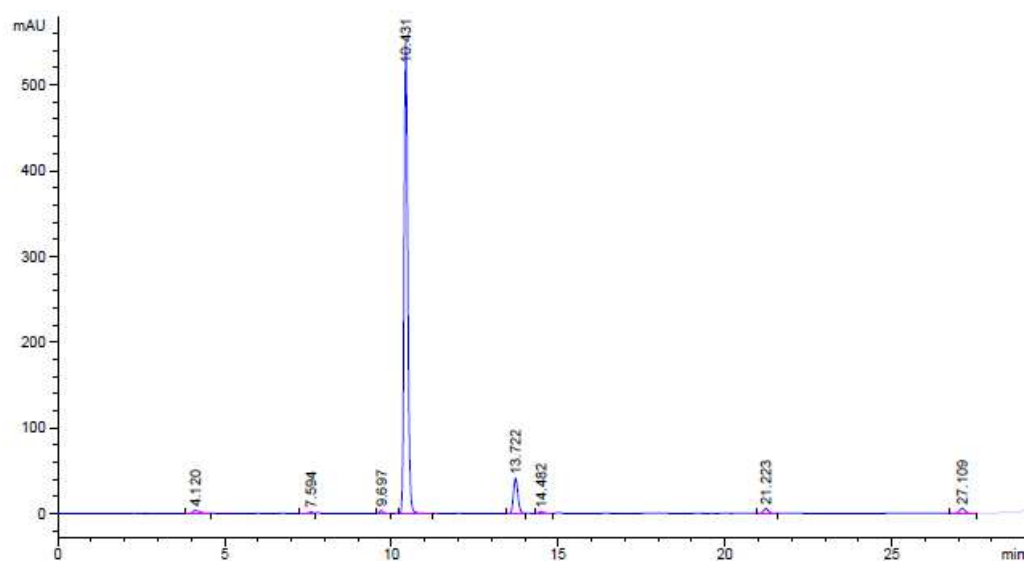

**Figure S1.** Chromatogram of extract 1 (P = 120 bar, cosolvent: water).

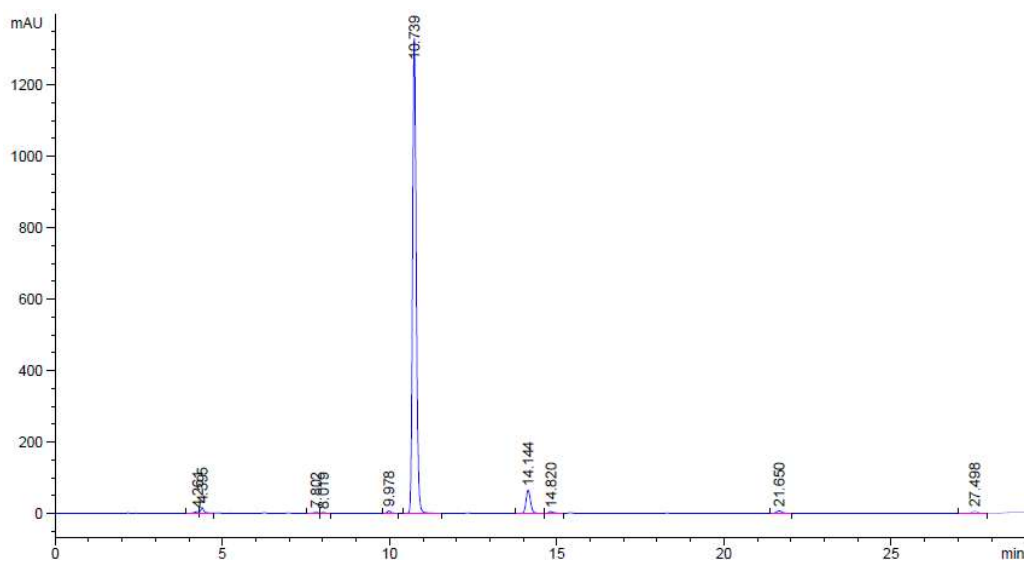

**Figure S2.** Chromatogram of extract 2 (P = 120 bar, cosolvent: ethanol).

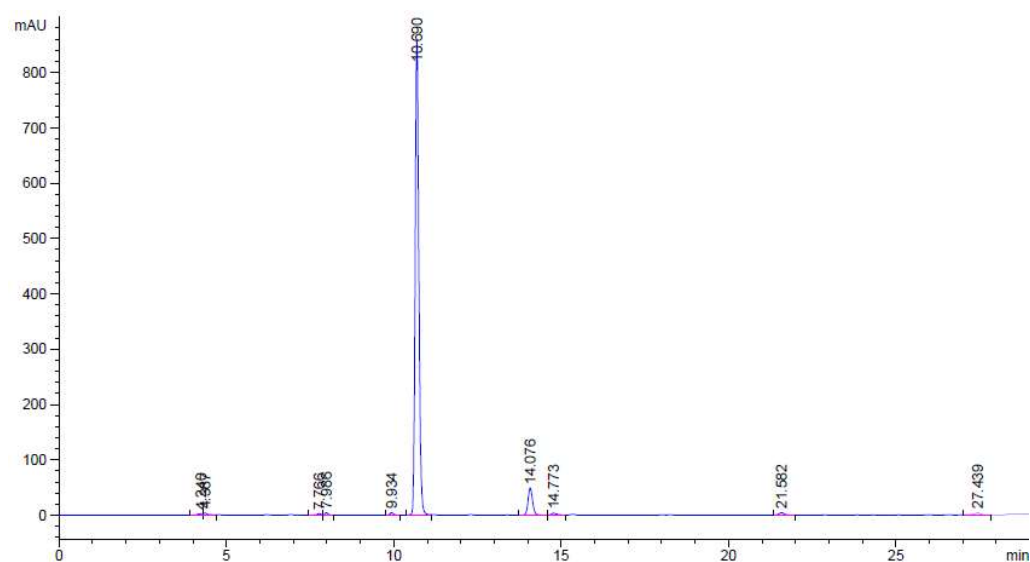

**Figure S3.** Chromatogram of extract 3 (P = 240 bar, cosolvent: water).

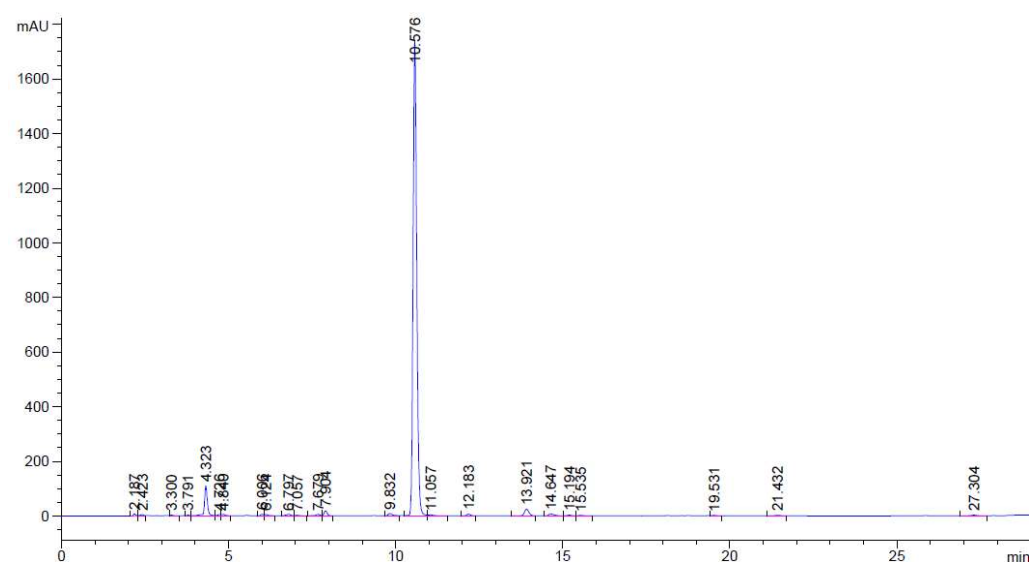

**Figure S4.** Chromatogram of extract 4 (P = 240 bar, cosolvent: ethanol).

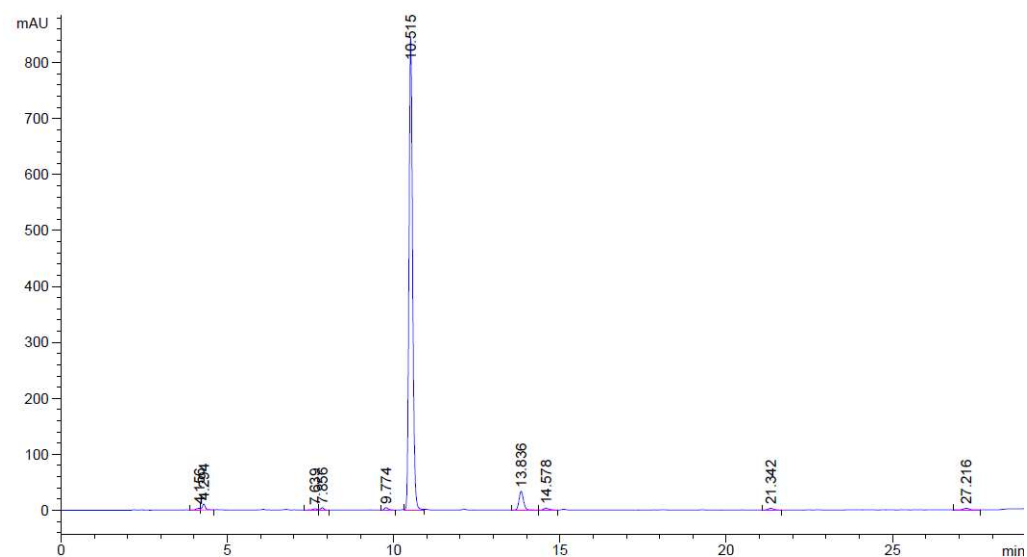

**Figure S5.** Chromatogram of extract 5 (P = 180 bar, cosolvent: ethanol:water).

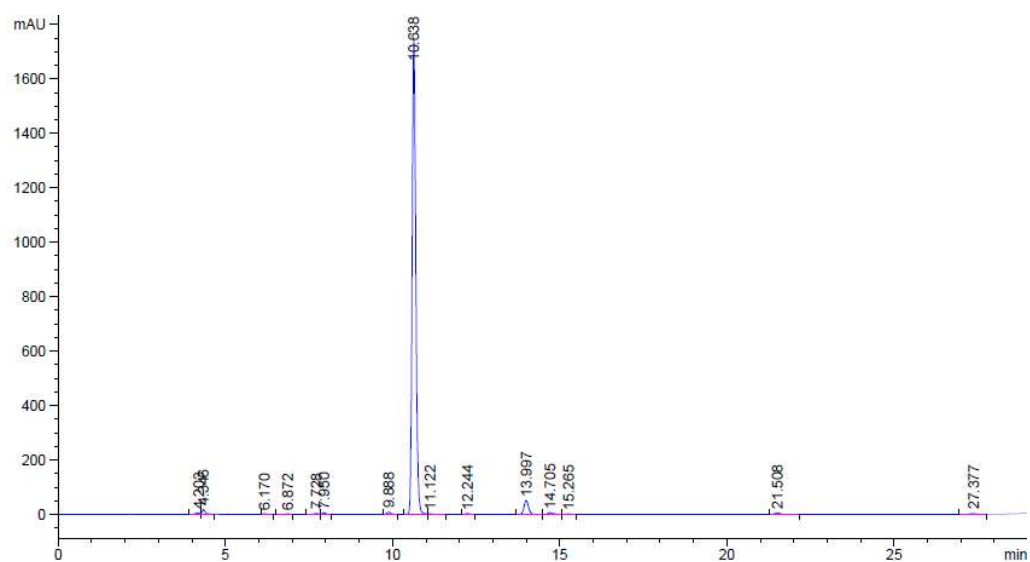

**Figure S6.** Chromatogram of extract 6 (P = 180 bar, cosolvent: ethanol:water).

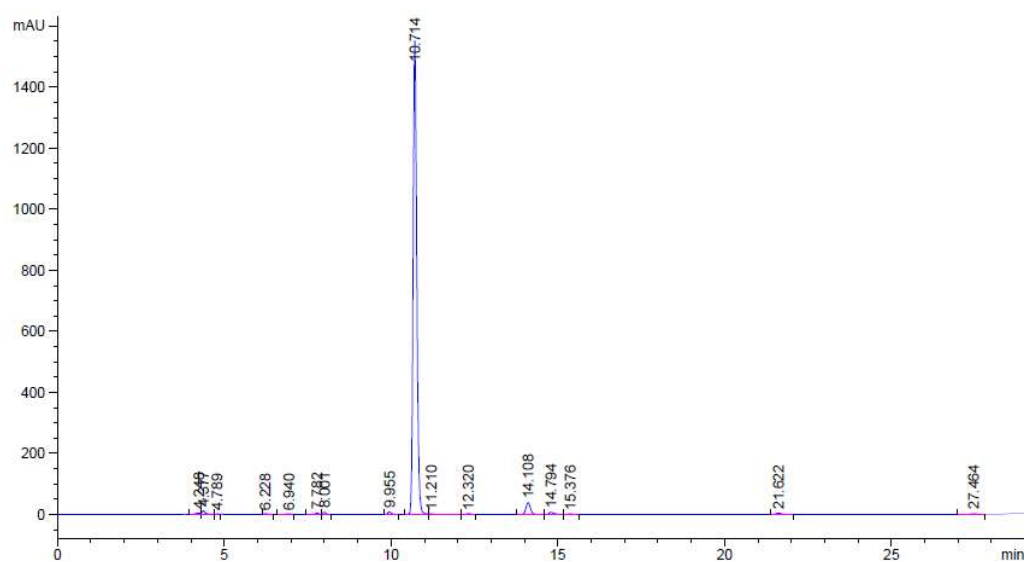

**Figure S7.** Chromatogram of extract 7 (P = 180 bar, cosolvent: ethanol:water).

Figures S8 and S9 present analysis results after extract purification. The compound *p*-anisic acid was concentrated at subfractions 4 and 5 that was evidenced by HPLC analysis (Figure S8).

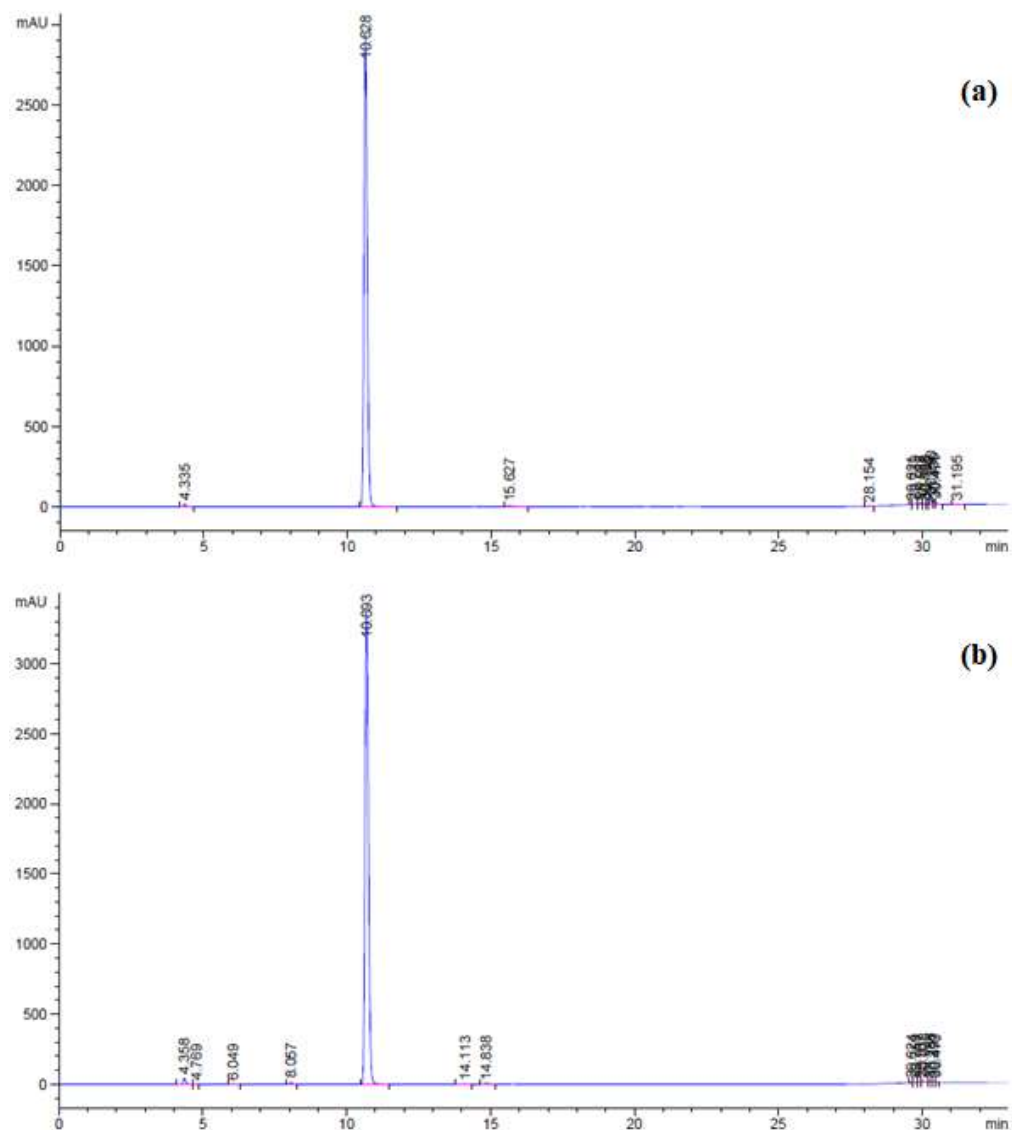

**Figure S8.** Chromatograms of **(a)** subfraction 4 and **(b)** subfraction 5 were obtained by silica gel column chromatography separation.

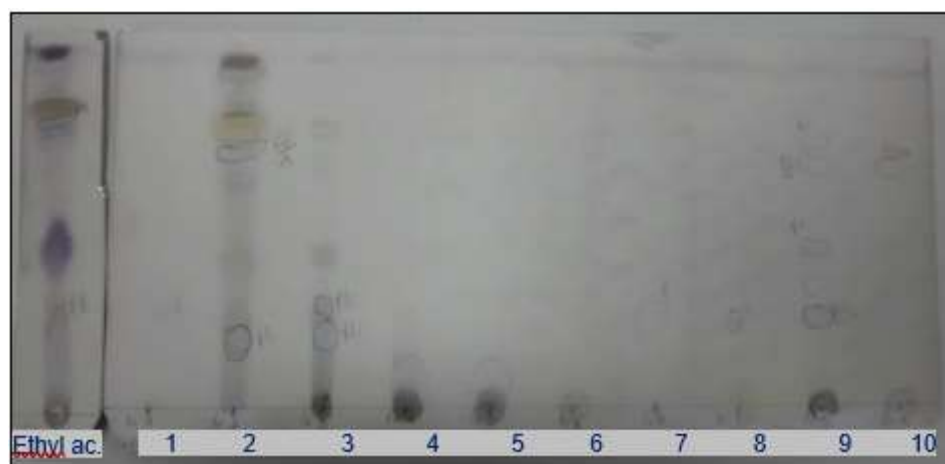

**Figure S9.** TLC for the ethyl acetate fraction and subfractions 1–10 after application of sulfuric vanillin as color reagent (the marks drawn represent the spots visualized under U.V. light).

Filename: molecules-1532240-supplementary.docx  
Directory: C:\Users\MDPI\Documents  
Template: C:\Users\MDPI\AppData\Roaming\Microsoft\Templates\Normal.  
dotm  
Title:  
Subject:  
Author: Graciane Fabiela da Silva  
Keywords:  
Comments:  
Creation Date: 1/25/2022 4:28:00 AM  
Change Number: 2  
Last Saved On: 1/25/2022 4:28:00 AM  
Last Saved By: Eduardo Cassel  
Total Editing Time: 0 Minutes  
Last Printed On: 1/30/2022 5:00:00 PM  
As of Last Complete Printing  
Number of Pages: 5  
Number of Words: 197 (approx.)  
Number of Characters: 1,078 (approx.)
